# Supplementary material for: SVDB: a Comprehensive Domain Specific Database of Snake Venom Toxins Generated Through NCBI
Source: Preprints.org preprint supplement (doi:10.20944/preprints201809.0454.v1), 2018-09-24

## **SUPPLEMENTARY FIGURE LEGENDS**

Figure S1. ERD of SVDB.

Figure S2. Database contents and workflow of SVDB.

## Supplementary Files

Figure S1: ERD of SVDB

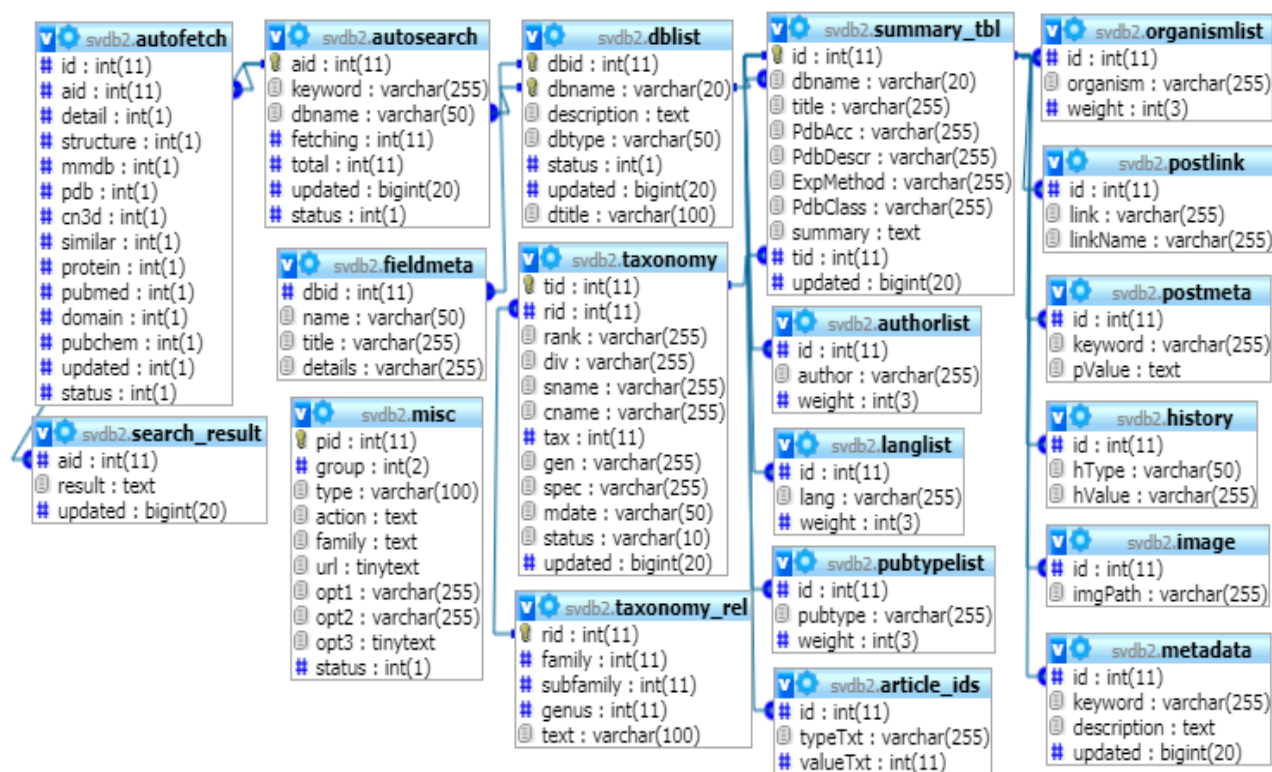

Figure S2: Database contents and workflow of SVDB.

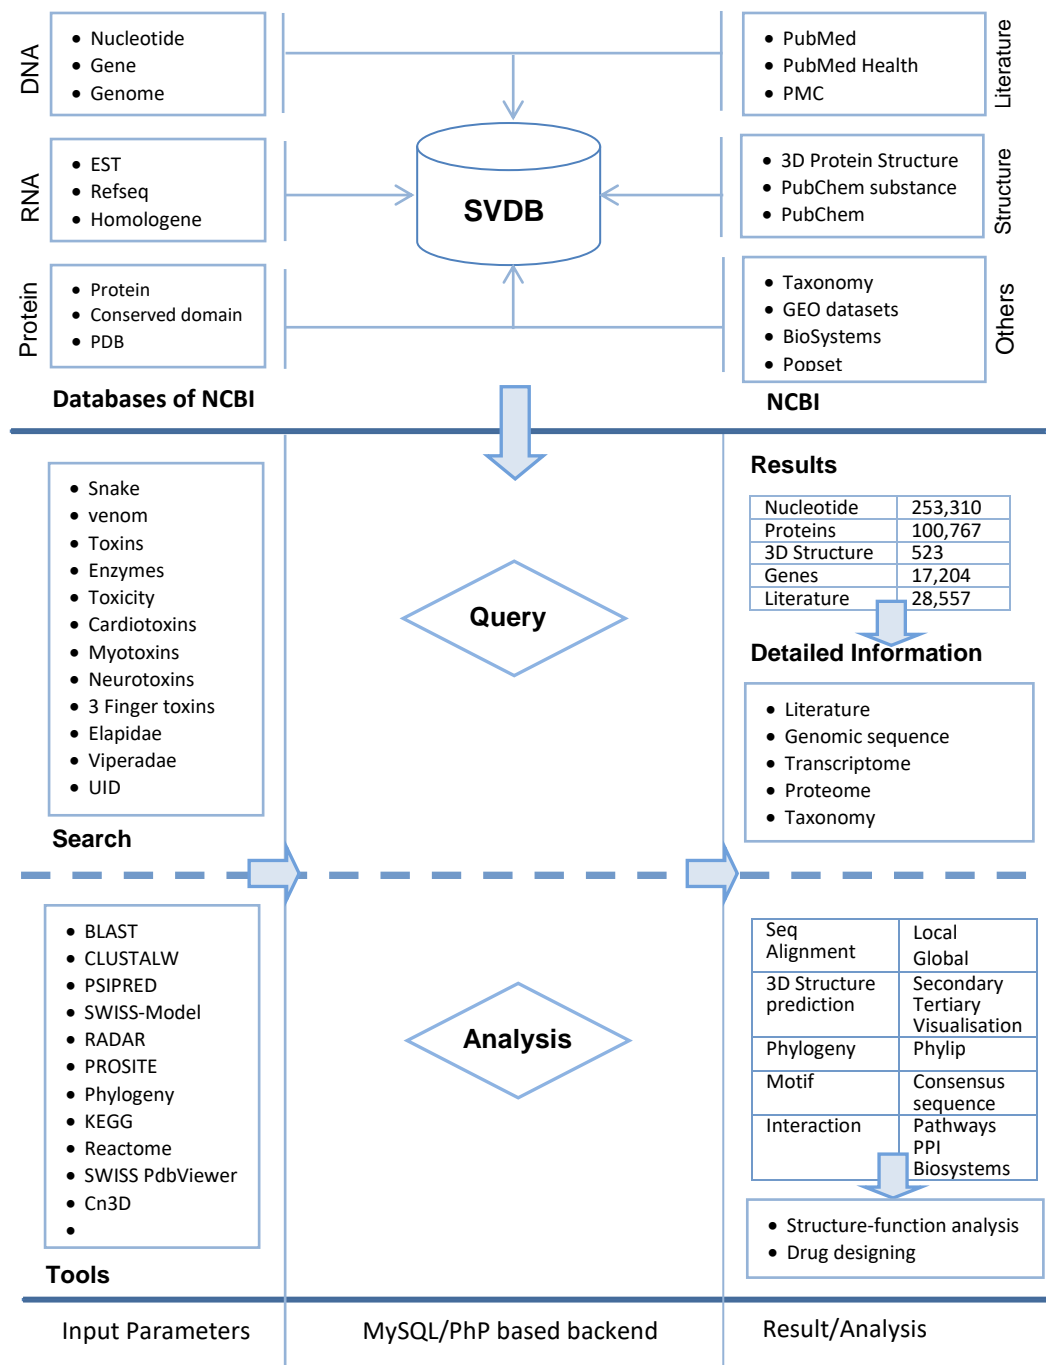

Supplement: Supplementary file 1 [file supplementary]
